# Supplementary material
Source: ML conference proceedings conference paper supplement (https://openreview.net/forum?id=NQuCQoHqqSY)

SSIM ( $\uparrow$ ) vs Train Sequence Length

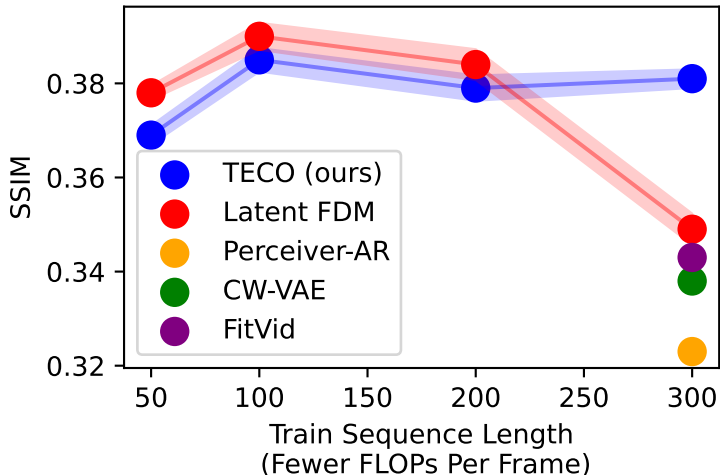

Supplement: supplementary_material [file attachment]

PSNR ( $\uparrow$ ) vs Train Sequence Length

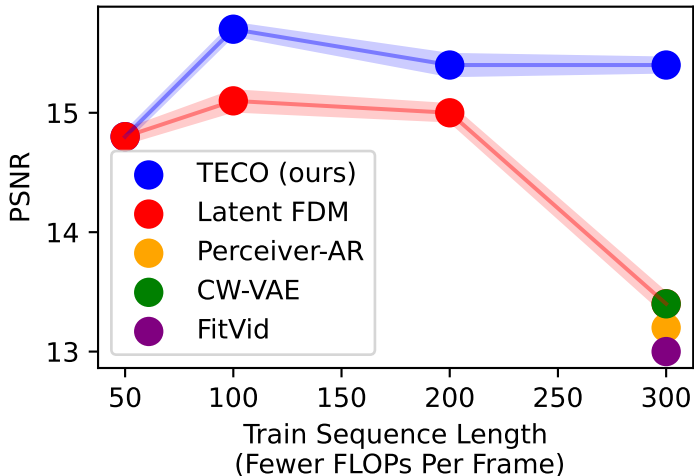

Supplement: supplementary_material [file attachment]

FVD ( $\downarrow$ ) vs Train Sequence Length

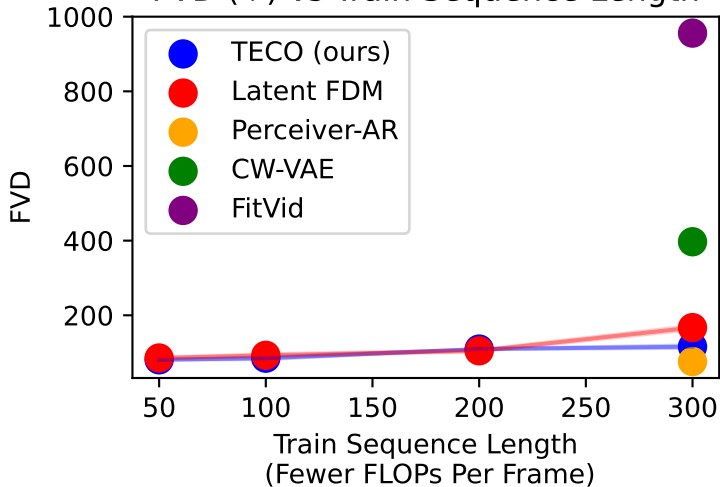

Supplement: supplementary_material [file attachment]

LPIPS ( $\downarrow$ ) vs Train Sequence Length

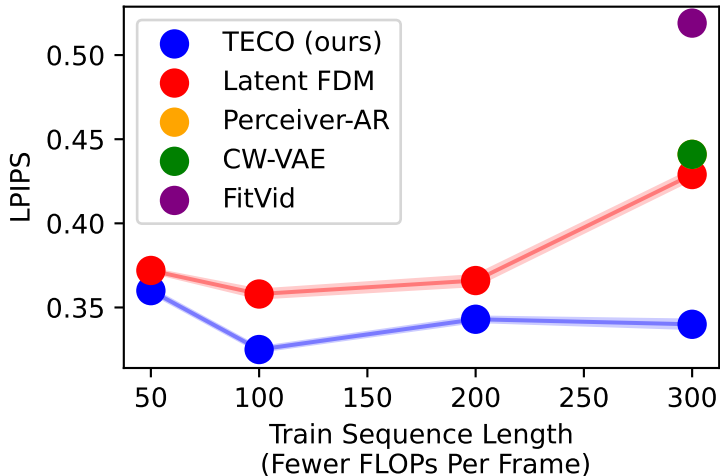

Supplement: supplementary_material [file attachment]
